# Supplementary material
Source: PubMed Central journal article supplement (PMC4929833)
Supplement: NIHMS795215-supplement-pmbaa26cf_supplementary_data_pdf.pdf [file NIHMS795215-supplement-pmbaa26cf_supplementary_data_pdf.pdf]

## Supplementary Document

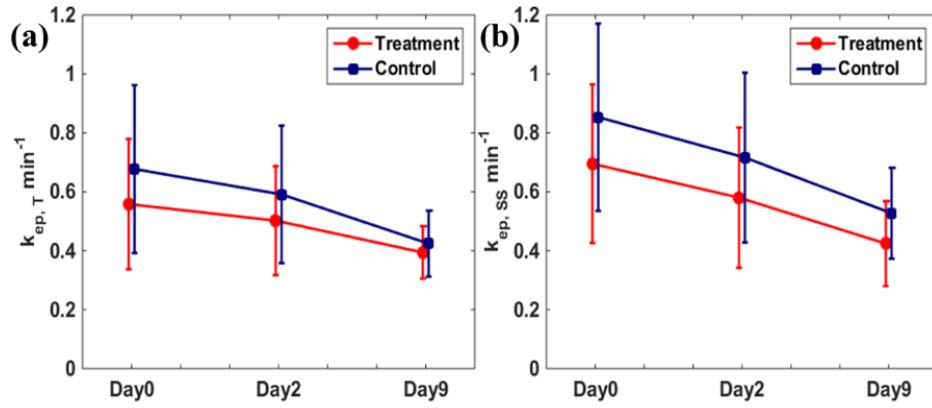

**Figure S1:** Comparisons of CA rate constant  $k_{ep}$  from the Tofts model (a) and from the SS model (b) at three DCE-MRI scan days. No significant difference were found between treatment/control groups'  $k_{ep}$  results
